# Overlap in the cortical representation of hand and forearm muscles as assessed by navigated TMS

Fang Jin<sup>1,2</sup>, Sjoerd M. Bruijn<sup>1,2</sup> and Andreas Daffertshofer<sup>1,2\*</sup>

<sup>1</sup> Department of Human Movement Sciences, Faculty of Behavioural and Movement Sciences, Vrije Universiteit Amsterdam, Amsterdam, Netherlands

<sup>2</sup> Institute Brain and Behavior Amsterdam, Vrije Universiteit Amsterdam, Amsterdam, Netherlands

\* Corresponding author: [a.daffertshofer@vu.nl](mailto:a.daffertshofer@vu.nl)

## Abstract

**Background:** The representation of upper limb muscles in the motor cortex is complex. It contains areas of excitability that may overlap between muscles.

**Objective/Hypothesis:** We expected the cortical representations of synergistic muscle pairs to overlap more than those of non-synergistic muscles.

**Methods:** To detail this, we used navigated transcranial magnetic stimulation in eight hand and forearm muscles of twenty healthy participants. We transformed the cortical representations of muscles to a template MRI to allow for group analysis.

**Results:** We found that the amount of overlap in cortical representations differed significantly between within-hand and within-forearm muscle combinations. Most synergistic muscle pairs, both within the hand, within the forearm and between them, had a larger overlap than non-synergistic muscle pairs.

**Conclusions:** Our study supports the largely overlapping nature of cortical representations of upper limb muscles. We can particularly underscore that the overlap is elevated in muscles that usually act in a synergistic manner.

## Keywords

TMS; neuro-navigation; motor mapping; cortical overlap; muscle synergies

## Introduction

Penfield and Boldrey [1] localised the somatic cortical representation of motor processing in primary cortex (M1) using electrical stimulation. While many subsequent studies established the principle structure of this motor homunculus, more fine-grained approaches revealed that it may deviate from a well-ordered organisation in that in particular upper limb muscles may have complex and sometimes overlapping representations [2]. Shinoda, et al. [3] demonstrated axons collateral from a single corticospinal neuron to branch into motor neuron pools of at least four muscles. More recent imaging studies confirmed that cortical representations of distinct upper limb muscles can overlap via functional magnetic resonance imaging (fMRI) [4, 5] or transcranial magnetic stimulation (TMS) [6-9]. The overlap in the cortical representation of muscles may indicate synergistic control of muscle groups [10]. Its functional relevance has been underscored by Tyč and Boyadjian [11] who found an increase in the overlap between distal and proximal upper limb muscles due to motor training. Moreover, different pathologies may come with an increased overlap of cortical representations, not necessarily restricted to the upper extremities [12-15]. According to Yao, et al. [12], stroke can be accompanied by an overlap between elbow and shoulder cortical representations associated with the loss of independent control for elbow and shoulder, a hallmark for compensatory strategies in stroke survivors. Elgueta-Cancino, et al. [16] reported the overlap between deep and superficial fibres of the multifidus muscle to be correlated with severity of low back pain.

As a non-invasive technique, TMS is well suited to investigate the overlap in cortical representations of muscles. For instance, Melgari, et al. [17] employed TMS to assess the amount of overlap between twelve muscles. They found a more pronounced overlap for hand-hand and forearm-forearm muscles combinations than between hand and forearm muscles, let alone for upper arm muscles. More recently, Tardelli, et al. [18] reported representations of forearm muscles to overlap more than those of intrinsic hand muscles. Muscle pairs known to be active in unison seem to have more cortical overlap than others [18]. Especially synergistic muscles seem to overlap more than non-synergistic ones [10].

To unravel the signature of synergistic muscle combinations further, we investigated the cortical representations of eight hand and forearm muscles in twenty healthy volunteers using navigated single-pulse TMS eliciting motor-evoked potentials (MEPs). To warrant a sufficient amount of MEPs as well as proper spatial resolution, we employed a pseudo-random TMS positioning [19]. We analysed the areas of excitability per muscle on subject-specific cortical surfaces of up to 1 mm resolution [20, 21], which were warped to a standardised template prior to group analyses. We hypothesised the muscles to have distinct, albeit partially overlapping cortical representations. We expected differences

between hand-hand, hand-forearm, and forearm-forearm muscle pairings. We particularly expected synergistic muscles to show a larger overlap than non-synergistic ones.

## Methods

Twenty healthy adults (eight females) participated in the study. Prior to the experimental assessments, they filled out standard TMS and MRI screening questionnaires and were informed of the measurement procedures and risks. All participants provided signed informed consent. The study was approved by VUmc Medical Ethics Committee (2018.213 - NL65023.029.18). The experiment was conducted in line with the Declaration of Helsinki.

### *TMS measurement*

Prior to TMS assessment, all the participants underwent T1-weighted MRI scanning (3T Achieva, Philips, Best, The Netherlands; matrix size 256×256×211, voxel size 1.0×1.0×1.0 mm<sup>3</sup>, and TR/TE 6.40/2.94 ms). We integrated the anatomical scans in the neuro-navigation system (Neural Navigator, Brain Science Tools BV, De Bilt, The Netherlands, [www.brainsciencetools.com](http://www.brainsciencetools.com)) by segmenting them for grey matter using SPM (SPM12, <https://www.fil.ion.ucl.ac.uk/spm/software/spm12/>) and identifying four fiducial points (nasion, nose tip, left and right peri-auricular points) for co-registration. Single-pulse mono-phasic stimulations were delivered using a Magstim 200<sup>2</sup> TMS stimulator with a 70 mm diameter figure-of-eight coil (Magstim Company Ltd., Whitland, Dyfed, UK). The elicited MEPs were captured by a 16-channel EMG amplifier (Porti, TMSi, Oldenzaal, the Netherlands) and sampled at 2 kHz. Bipolar electrodes were positioned following SEMIAN convention; see Figure 1.

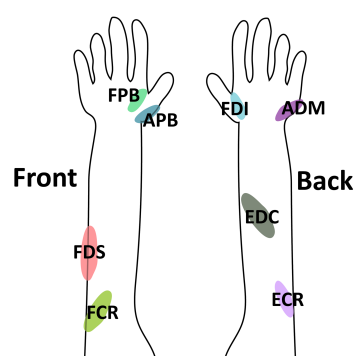

**Figure 1.** Eight muscles of the right hand and right forearm considered in this study: first dorsal interosseous (FDI), abductor digiti minimi (ADM), flexor pollicis brevis (FPB), abductor pollicis brevis (APB), extensor digitorum communis (EDC), flexor digitorum superficialis (FDS), extensor carpi radialis (ECR), and flexor carpi radialis (FCR). In the left panel the palm is pointing inward, in the right panel it faces outward.

After identifying the respective hot spots, we determined the resting motor thresholds (RMTs) for FDI, EDC, and FCR. The RMTs served to define three conditions, namely stimulation intensities set to 105% of the respective RMTs. For each of them, we stimulated 120 times with a 5s inter-stimulation duration (fixed via a revised version of <https://github.com/armanabraham/Rapid2>). As said, we employed a pseudo-random coil positioning [19] that covered roughly 5×5 cm around the corresponding hot spot.

The entire procedure was carried out twice yielding  $2 \times 120 = 240$  stimulations per intensity; see [21] for further details.

### Data analysis

The EMG signals were high-pass filtered at 30 Hz using a 2<sup>nd</sup>-order bi-directional Butterworth filter. We identified stimulations with proper motor-evoked potential (MEPs) based on the peak-to-peak EMG amplitude (less than 10 mV but larger than twenty times the baseline's standard deviation obtained 200 ms prior to stimulation). All stimulations were classified as either MEP or non-MEP points. Stimulations outside M1 ("precentral L" in the atlas "Mindboggle6" [22]) were eliminated.

In contrast to the online monitoring outlined above, our data analysis relied on the individual MRIs that we segmented using FreeSurfer (<http://surfer.nmr.mgh.harvard.edu/>) – we used the pial-surface for subsequent analysis. For the within group comparison we used the MNI152 default subject implemented in Brainstorm [23] as template surface.

The subsequent analysis steps are illustrated in Figure 2. In brief, coil coordinates and orientations were registered from the individual MRI surface (panel B) that we inflated to the unit sphere (panel C). In Figure 2,  $S$  represents a stimulation point located in the individual sphere. To map this point to the template (panel D), we searched for the sphere-inflated template vertex with minimum great circle distance. The resulting points (panel E) were finally deflated to the template surface (panel F).

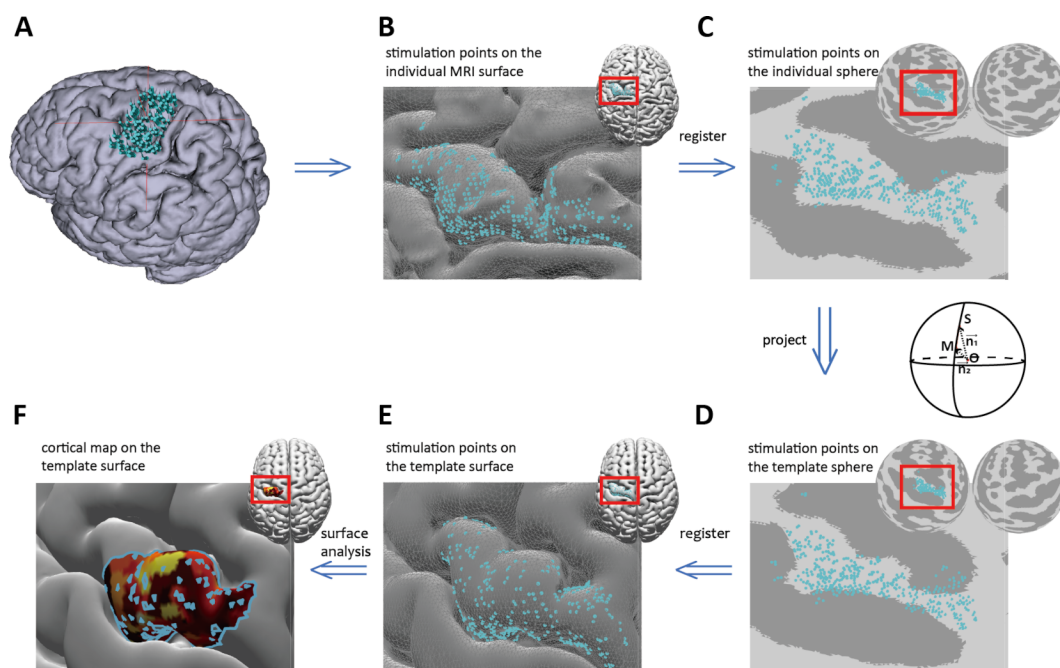

**Figure 2.** Processing pipeline. The blue dots represent the stimulation points. The surfaces in panels A and B are the individual MRI surfaces and panel C depict the mapping to the unit spheres per hemisphere. The lower row relates to the template representation where panel D is the transform to the corresponding unit spheres that can readily mapped to the MNI152 template (panel E). Panel F displays the estimated area of excitability, colour-coded by the MEP amplitudes.

100 We used our open-source surface analysis toolbox (<https://github.com/marlow17/surfaceanalysis>)  
 101 [21] to quantify the cortical representation of every muscle by its area. In the triangulated cortex mesh,  
 102 we first determined the area's vertices, i.e.,  $\mathcal{A} = \{\vec{v}_1, \dots, \vec{v}_N\}$  with  $\vec{v}_i = (v_{x,i}, v_{y,i}, v_{z,i})^T$  and set their  
 103 MEP values  $\text{MEP}_i$  by interpolating the MEP amplitudes corresponding to the original stimulation  
 104 points – see [21] for more details about the underlying search algorithm. Here, we abbreviate the  
 105 resulting (MEP-weighted) area by  $\mathcal{W} = \{(\vec{v}_1, \text{MEP}_1), \dots, (\vec{v}_N, \text{MEP}_N)\}$ . In, e.g., Figure 2 (panel F), the  
 106 area is shown as colour-code patches with yellow indicating the largest MEP amplitudes, i.e., the  
 107 highest degree of muscle-specific excitability.

108 In line with previous studies, we first parametrised an area's location via its centroid given by

$$\vec{c} = \vec{c}(\mathcal{W}) = \left( \sum_{(\vec{v}, \text{MEP}) \in \mathcal{W}} \text{MEP} \cdot \vec{v} \right) / \left( \sum_{(\vec{v}, \text{MEP}) \in \mathcal{W}} \text{MEP} \right) \quad (1)$$

109 Next, we computed the size of an area via the triangular prism. For this, consider a triangle in  $\mathcal{A}$  let  
 110 the lengths between its vertices be  $\lambda_1 = \|\vec{v}_1 - \vec{v}_2\|_2$ ,  $\lambda_2 = \|\vec{v}_2 - \vec{v}_3\|_2$  and  $\lambda_3 = \|\vec{v}_3 - \vec{v}_1\|_2$ , where  
 111  $\|\cdots\|_2$  denotes the Euclidean distance. Then, the area size  $W := \|\mathcal{W}\|$  reads

$$\|\mathcal{W}\| = W = \sum_{k=1}^M \overline{\text{MEP}}_k \sqrt{\Lambda_k (\Lambda_k - \lambda_{1,k}) (\Lambda_k - \lambda_{2,k}) (\Lambda_k - \lambda_{3,k})} \quad \text{with} \quad \Lambda_k = \frac{1}{2} \sum_{i=1}^3 \lambda_{i,k} \quad (2)$$

112 with  $\overline{\text{MEP}}_k = \frac{1}{3} \sum_{i=1}^3 \text{MEP}_{i,k}$  being the mean value of (interpolated) MEP amplitudes at the three  
 113 vertices of triangle  $k$ .

114 Finally, we assessed the overlap between the cortical representations by combining the eight muscles  
 115 into 28 distinct pairs (FDI-ADM, FDI-APB, ...) and defining three groups of muscles: hand-hand, hand-  
 116 forearm, and forearm-forearm. This grouping eased focusing on effects of (non-)synergistic muscle  
 117 combinations. Evidently, the overlap between areas can be quantified via their intersect that we here  
 118 normalised using the corresponding union. That is, per muscle pair  $(k, l)$  we defined :

$$O_{kl} = \frac{\|\mathcal{W}_k \cap \mathcal{W}_l\|}{\|\mathcal{W}_k \cup \mathcal{W}_l\|} \quad (3)$$

119 where  $\|\cdots\|$  denotes the size definition given in Eq. (2). This computation is illustrated in Figure 3.  
 120 Here we would like to note that by transforming the subject-specific cortex stimulation points to the  
 121 template (cf. Fig. 2) both  $\vec{c}$  and  $O_{kl}$  could readily enter our group analysis (see below under *Statistics*).

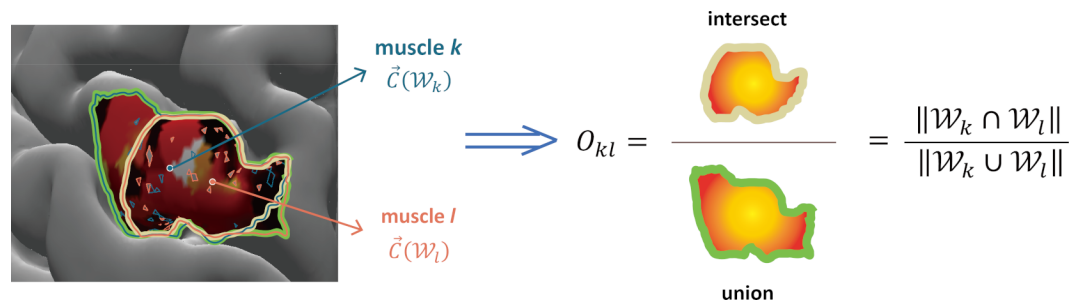

**Figure 3.** Illustration of the centroid and overlap definition of two muscles  $k$  and  $l$ . To ease visual inspection, we highlighted the contour of the two areas; cf. Eq. (3).

## Statistics

A two-way ANOVA with factors of *Muscle* and *Intensity* served to test for significant differences in the centroids  $\vec{c}$  and the area size  $W$  across all muscles. Subsequently, we grouped the muscles into hand and forearm muscle and analysed between-group and within-group (hand-hand, forearm-forearm, and hand-forearm) differences in the overlaps  $O_{kl}$  using a two-way ANOVA with factors *Muscle-Group* and *Intensity*. For the overlaps, we also performed post-hoc tests of muscle combinations within groups of pairs. For this we conducted three separate two-way ANOVAs with *Pair* and *Intensity* as factors. Note that the results of the post-hoc analysis of the hand-forearm combinations are reported in the *Supplementary Material*. Prior to all analyses, we tested for sphericity using Mauchly tests and applied a Greenhouse-Geisser correction whenever necessary. Throughout analysis we considered a significant threshold of  $\alpha = 0.05$ ; all ANOVAs used repeated measures. Post-hoc assessments were Bonferroni corrected. We realised all analyses in Matlab 2022a (MathWorks, Natick, MA, USA).

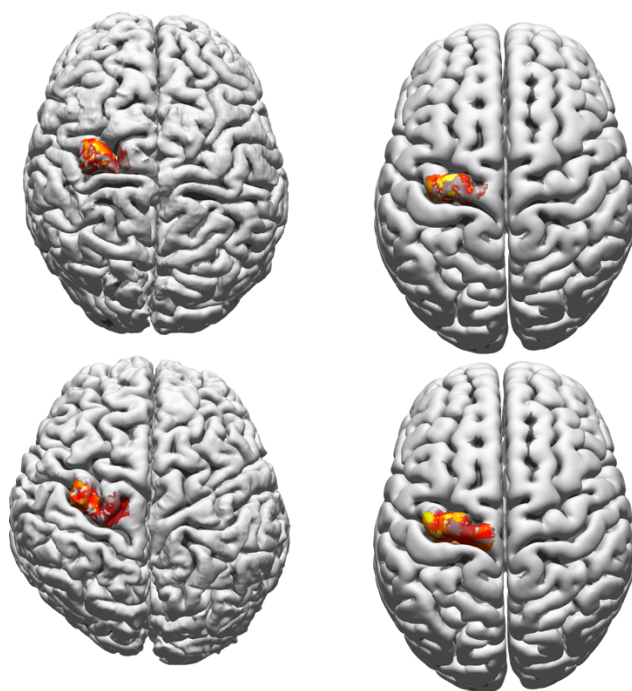

**Figure 4.** Two examples of the warping of the area of excitation of a single muscle to the template surface – left column: subject-specific cortical surface; right column: mapping on the template surface. One participant is of European descent (upper row), the other of East-Asian descent (lower row); in both cases the MEP-weighted region of excitability of FDI has been selected. Here we would like to note that stimulation points outside the contralateral M1, defined as the left precentral area, have been removed; see Fig. 2 for the corresponding procedures.



## Results

### *Muscle representations*

Before summarising the results of our hypothesis testing, we first illustrate two examples of warping the cortical surfaces to the MNI152 template surface in Figure 4.

Figure 5 depicts the corresponding group average for the 105%-RMT-FDI intensity ( $= 47.25 \pm 2.16\%$  stimulator intensity;  $EDC = 47.68 \pm 2.23\%$  and  $FCR = 50.58 \pm 2.28\%$  can be found in the *Supplementary Material*). The representation clearly differed between muscles with, on average, FDI showing the highest degree of excitability.

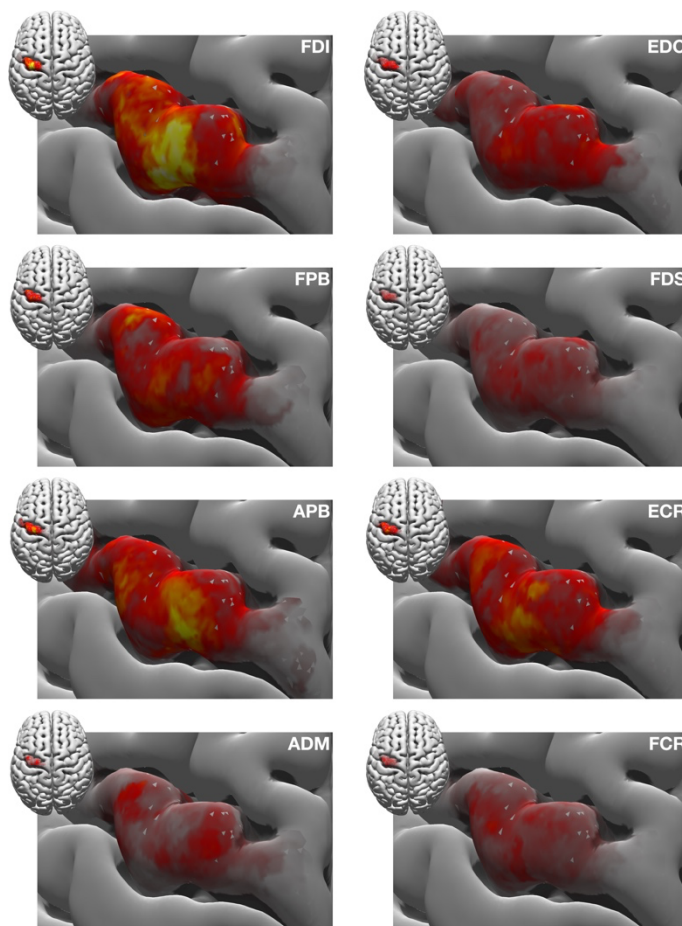

**Figure 5.** Group average of the cortical representations of the eight muscles under study. The areas are shown on the MNI template surface and represent excitability maps for the 105%-RMT-FDI intensity. The colour coding is given by the size of the corresponding MEPs in arbitrary units, where yellow implies a large MEP amplitude and dark red a low one; the same figure with muscle-specific scaling is given in the *Appendix* (Figure A1) and in the *Supplementary Material* we show the other stimulation intensities as well as intensity maps of some participants.

### *Position and size of the cortical muscle representation*

Overall, the hand representations were more lateral whereas those of the forearm muscles; see Figure 6 where we show the average centroid positions for the 105%-RMT-FDI in the 2D-plane.

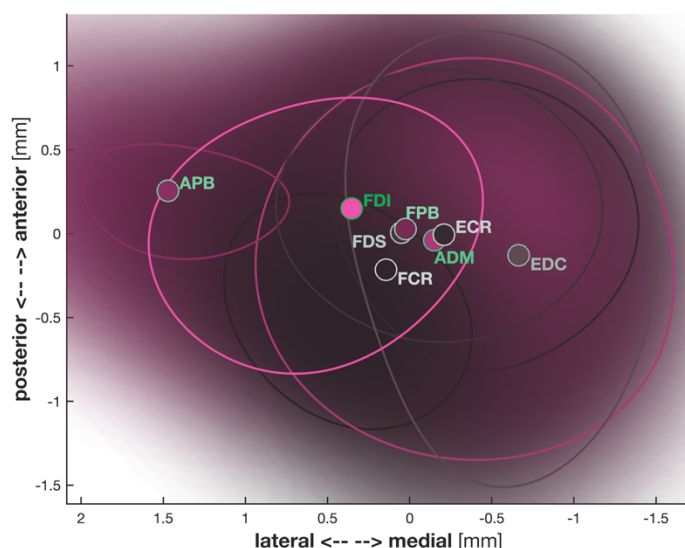

**Figure 6.** Centroids of eight muscles averaged for all participants. The different pink colours are used to symbolize the hand muscles, while brown indicates the forearm muscles. Apparently, the hand muscles are more lateral than the forearm muscles. Contour lines indicate the 5% probability boundary of the corresponding density (over the group of participants).

As summarised in Table 1, the centroid positions in the lateral/medial and superior/inferior directions ( $C_y$  and  $C_z$ , respectively) and the size of area and differed significantly per *Muscle*. Neither parameter showed significant effects of *Intensity* or a significant *Intensity*  $\times$  *Muscle* interaction.

**Table 1.** Statistics the cortical representation of the eight muscles.  $W$  = area size, centroid components:  $C_x$  = lateral/medial,  $C_y$  = anterior/posterior,  $C_z$  = superior/inferior. Significant effects are shown in **bold**.

|       | <i>Intensity</i> |          | <i>Muscle</i> |             | <i>Intensity</i> $\times$ <i>Muscle</i> |          |
|-------|------------------|----------|---------------|-------------|-----------------------------------------|----------|
|       | F(2,26)          | <i>p</i> | F(7,91)       | <i>p</i>    | F(14,182)                               | <i>p</i> |
| $C_x$ | 0.354            | .705     | 1.349         | .273        | 1.041                                   | .405     |
| $C_y$ | 0.090            | .914     | 4.668         | <b>.000</b> | 1.299                                   | .270     |
| $C_z$ | 0.760            | .435     | 4.728         | <b>.000</b> | 1.272                                   | .288     |
| $W$   | 3.865            | .060     | 3.147         | <b>.040</b> | 1.461                                   | .251     |

#### Size of the overlapping areas

The overlap between representations differed significantly between muscle groups ( $F(2,38) = 208.862$ ,  $p = .000$ ). There was also a significant effect of *Intensity* ( $F(2,38) = 6.246$ ,  $p = .005$ ) as well as a significant *Intensity*  $\times$  *Muscle-Group* interaction ( $F(4,76) = 5.326$ ,  $p = .001$ ). For the 105%-RMT-FCR intensity, the overlap was larger than in both 105%-RMT-FDI ( $p = .021$ ) and EDC ( $p = .011$ ). Post-hoc pairwise comparisons revealed no significant differences in the overlap between the different pair groups. Corresponding descriptive statistics is illustrated in Figure 7.



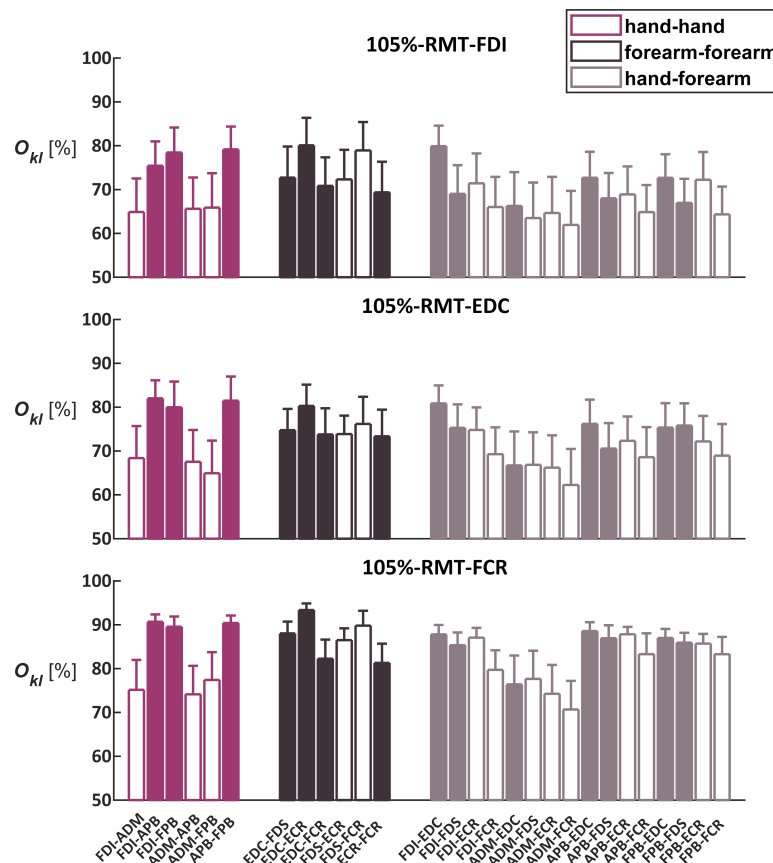

**Figure 7.** Overlap of all muscle pairs. The shown percentages of Overlaps  $O_{kl}$  between muscle pairs expressed in percentage (of the union area) for the three intensities. Error bars represent the standard error over participants; colour-coding agrees with Fig. 6.

#### Within muscle-group overlaps (post-hoc analyses)

For the hand-hand muscle pairs the overlap displayed significant main effects of *Intensity* and *Pair* ( $F(2,38) = 4.979$ ,  $p = .012$  and  $F(5,95) = 4.021$ ,  $p = .034$ , respectively) while the *Intensity*  $\times$  *Pair* interaction did not reach significance ( $F(10,190) = 0.422$ ,  $p = .819$ ). The overlaps at 105%-RMT-FCR were larger than at 105%-RMT-EDC ( $p = .044$ ). Analysing the forearm-forearm muscle group revealed pretty much the same effects (*Intensity*:  $F(2,38) = 3.768$ ,  $p = .032$  and *Pair*:  $F(5,95) = 3.870$ ,  $p = .016$  as well as *Intensity*  $\times$  *Pair*:  $F(10,190) = 0.433$ ,  $p = .808$ ). Again, the overlaps were larger for 105%-RMT-FCR than for 105%-RMT-EDC ( $p = .029$ ). Additionally, the overlap of the FDS-FCR combination exceeded that of ECR-FCR ( $p = .027$ ). Finally, the overlaps of hand-forearm muscle pairs were significantly affected by the factor *Intensity* ( $F(2,38) = 6.987$ ,  $p = .003$ ) but not by *Pair* ( $F(15,285) = 1.859$ ,  $p = .164$ ). The *Intensity*  $\times$  *Pair* interaction was again not significant ( $F(30,570) = 0.668$ ,  $p = .706$ ). However, here both 105%-RMT-FDI and -EDC intensities showed smaller overlaps than 105%-RMT-FCR ( $p = .012$  and  $p = .013$ , respectively).

## Discussion

We mapped eight hand and forearm muscles using navigated TMS and assessed the overlap in cortical representations of 28 muscle pairs. For the group analyses we warped the subject-specific cortex surfaces to a standardised template. Using surface analysis, we quantified the areas of excitability by centroid positions and area size. The hand representations were lateral whereas those of the forearm muscles were more medial. This was expected as earlier studies showed digit movements to be more laterally represented than upper limb movements [24]. We can also support that the thumb muscles (FDI, APB and FPB) are lateral to the little finger muscle (ADM).

Previous research using electrical stimulation in monkeys and humans demonstrated that cortical representations of the upper limb muscles can overlap [2]. As such we expected the cortical representations to (partly) overlapping. Yet, we hypothesised the overlap to differ between the hand-hand, forearm-forearm, and hand-forearm muscle combinations as well as between synergistic and non-synergistic muscles.

### *Overlap in cortical representations – synergistic versus non-synergistic muscles*

The amount of overlap did indeed differ significantly between hand-hand, hand-forearm, and forearm-forearm muscle pairs groups. Melgari, et al. [17] showed that the amount of overlap in the hand-hand, hand-forearm, and forearm-forearm pairs to be higher between hand-arm and arm-arm pairs and according to Tardelli, et al. [18] the overlap between intrinsic hand muscles (ADM-FPB) is smaller than between forearm and hand muscles (FCR-ADM and FCR-FPB). Our research revealed a significant difference between muscle-pair groups but not always so in the pair-wise comparisons. This discrepancy calls for future studies involving even more muscles than we currently did, as this may clarify further how the amount of cortical overlap relates to the muscles' anatomical locations.

By and larger, the synergistic muscle pairs overlapped more than the muscle pairs without synergistic function. In the hand-hand muscle pairs, the average overlap of synergistic muscle pairs (FDI-APB, FDI-FPB, APB-FPB) was higher than the overlap in non-synergistic muscle pairs (ADM-FDI, ADM-APB, ADM-FPB). The synergistic muscle pairs (EDC-ECR, FDS-FCR) demonstrated more overlap than other forearm-forearm muscle pairs. The pairwise comparisons revealed that FDS-FCR overlapped significantly more than ECR-FCR. Massé-Alarie, et al. [10] also reported the ECR-EDC overlap to be stronger than the ECR-FCR overlap. Likewise, DeJong, et al. [25] showed that the synergistic pairs FDI-APB and EDC-ECR overlap more than other muscle pairs.

The ADM related muscles pairs (ADM-FDI, ADM-APB, and ADM-FPB) had smaller overlaps than the FDI-APB, FDI-FPB, and APB-FPB pairs. The average centroid of ADM was more medial than the

centroids of FDI, APB, and FPB; see Figure 6. However, there was no significant difference in the centroids of cortical representation between other muscle pairs (ECR-FCR, ADM-FCR, etc.). We hence speculated that hand-hand overlap may be more associated with the distribution of the cortical representation, while other hand-hand overlaps may be more related to the structure of other elements of the descending motor neuronal pathway.

### *Limitations*

While random coil positioning in combination with neuro-navigation is becoming common practise, the group analysis via transferring areas of excitability on a template is new. In fact, transforming centroid positions to the template is straightforward. Here, we used inflated spheres in combination with the great circle distance (see [26] for an alternative, namely, the minimisation Euclidian distances in deep brain regions). While this step is common in MRI studies, one should realise that its appropriateness stands and falls with the quality of surface inflation, and this might be difficult to quantify. Yet, we believe that this position is more accurate than (piecewise) affine transforms using isolated anatomical landmarks. However, when warping areas (and likewise volumes), geometrical transforms locally alter the neural density rendering subsequent biophysical modelling a challenge. As such, the ‘real’ degree of excitability should be interpreted with care and future studies should look in more detail into the possible effects. And, since the curvature between original and template surface may differ substantially, corrections for coil-orientation may become important.

A similar concern appears when recognising that the intensity of TMS strongly influences the amount of overlap. Higher intensity mapping will lead to more overlap. DeJong, et al. [25] showed this for the relationship between overlap amount and intensities. Especially at higher stimulation intensities, the observed overlap may – and probably will – be due to the stimulation at one point “radiating” to the adjacent surface, which will induce an MEP in other muscles. Any statement about the achieved spatial resolution when estimating areas (or volumes) of excitability and, more so, overlaps therefore should hence be questioned. To minimise this effect, we deliberately chose for minimum intensity just above RMT. We must admit that we cannot exclude radiation. Electrical field distribution analysis of TMS [26-28] may solve this, in particular when combined with other imaging modalities like fMRI [29]. While we consider this beyond the scope of the current study, we certainly advocate such multi-modal approaches for future studies.

Subcortical tissues have been considered a deep cause of overlap in the cortex (Shinoda et al., 1981). For subcortical analysis of TMS data, Aberra, et al. [30] simulated the electrical field in morphologically-realistic cortical neurons, which could be used to describe the overlap at the subcortical level. Crosstalk of surface EMG may also appear as an overlap in cortical representations

[10]. In the future, better EMG recording methods that limit crosstalk between muscle pairs or other techniques that record muscle activity could be used in overlap mapping research.

## Conclusion

We used TMS to assess amount and position of the overlap between the cortical representations of eight hand and forearm muscles. We projected individual subject data to a high-resolution template cortical mesh. Hand muscles turned out to be more laterally positioned than the more medial forearm representations. Most synergistic muscle pairs displayed significantly more cortical overlap than their non-synergist counterparts.

## Declaration of interest

The authors declare that they have no known competing financial interests or personal relationships that could have appeared to influence the work reported in this paper.

## Acknowledgements

FJ would like to thank the Chinese Scholarship Council for financial support (CSC # 201706210060).

## References

- [1] Penfield W, Boldrey E. Somatic motor and sensory representation in the cerebral cortex of man as studied by electrical stimulation. *Brain* 1937;60(4):389-443.
- [2] Schieber MH. Constraints on somatotopic organization in the primary motor cortex. *Journal of neurophysiology* 2001;86(5):2125-43.
- [3] Shinoda Y, Yokota J-I, Futami T. Divergent projection of individual corticospinal axons to motoneurons of multiple muscles in the monkey. *Neuroscience letters* 1981;23(1):7-12.
- [4] Plow EB, Arora P, Pline MA, Binenstock MT, Carey JR. Within-limb somatotopy in primary motor cortex—revealed using fMRI. *Cortex* 2010;46(3):310-21.
- [5] Huber L, Finn ES, Handwerker DA, Bönstrup M, Glen DR, Kashyap S, et al. Sub-millimeter fMRI reveals multiple topographical digit representations that form action maps in human motor cortex. *Neuroimage* 2020;208:116463.
- [6] van Elswijk G, Kleine BU, Overeem S, Eshuis B, Hekkert KD, Stegeman DF. Muscle imaging: Mapping responses to transcranial magnetic stimulation with high-density surface electromyography. *Cortex* 2008;44(5):609-16.
- [7] Schabrun SM, Stinear CM, Byblow WD, Ridding MC. Normalizing motor cortex representations in focal hand dystonia. *Cerebral cortex* 2009;19(9):1968-77.
- [8] Raffin E, Siebner HR. Use-dependent plasticity in human primary motor hand area: synergistic interplay between training and immobilization. *Cerebral Cortex* 2019;29(1):356-71.

- [9] Sigurdsson HP, Jackson SR, Kim S, Dyke K, Jackson GM. A feasibility study for somatomotor cortical mapping in Tourette syndrome using neuronavigated transcranial magnetic stimulation. *Cortex* 2020;129:175-87.
- [10] Massé -Alarie H, Bergin MJ, Schneider C, Schabrun S, Hodges PW. “Discrete peaks” of excitability and map overlap reveal task-specific organization of primary motor cortex for control of human forearm muscles. *Human brain mapping* 2017;38(12):6118-32.
- [11] Tyč F, Boyadjian A. Plasticity of motor cortex induced by coordination and training. *Clinical Neurophysiology* 2011;122(1):153-62.
- [12] Yao J, Chen A, Carmona C, Dewald JP. Cortical overlap of joint representations contributes to the loss of independent joint control following stroke. *Neuroimage* 2009;45(2):490-9.
- [13] Tsao H, Danneels LA, Hodges PW. ISSLS prize winner: smudging the motor brain in young adults with recurrent low back pain. *Spine* 2011;36(21):1721-7.
- [14] Schabrun SM, Hodges PW, Vicenzino B, Jones E, Chipchase LS. Novel adaptations in motor cortical maps: the relationship to persistent elbow pain. *Med Sci Sports Exerc* 2014;5(1):1-34.
- [15] Marneweck M, Kuo H-C, Smorenburg AR, Ferre CL, Flamand VH, Gupta D, et al. The relationship between hand function and overlapping motor representations of the hands in the contralesional hemisphere in unilateral spastic cerebral palsy. *Neurorehabilitation and neural repair* 2018;32(1):62-72.
- [16] Elgueta-Cancino E, Sheeran L, Salomoni S, Hall L, Hodges PW. Characterisation of motor cortex organisation in patients with different presentations of persistent low back pain. *European Journal of Neuroscience* 2021.
- [17] Melgari J-M, Pasqualetti P, Pauri F, Rossini PM. Muscles in “concert”: study of primary motor cortex upper limb functional topography. *PloS one* 2008;3(8):e3069.
- [18] Tardelli GP, Souza VH, Matsuda RH, Garcia MA, Novikov PA, Nazarova MA, et al. Forearm and hand muscles exhibit high coactivation and overlapping of cortical motor representations. *Brain Topography* 2022:1-15.
- [19] Van De Ruit M, Perenboom MJ, Grey MJ. TMS brain mapping in less than two minutes. *Brain stimulation* 2015;8(2):231-9.
- [20] Kraus D, Gharabaghi A. Projecting navigated TMS sites on the gyral anatomy decreases inter-subject variability of cortical motor maps. *Brain stimulation* 2015;8(4):831-7.
- [21] Jin F, Bruijn SM, Daffertshofer A. Accounting for stimulations that do not elicit motor-evoked potentials when mapping cortical representations of multiple muscles. *bioRxiv* 2022:2021.07.29.454279.
- [22] Klein A, Hirsch J. Mindboggle: a scatterbrained approach to automate brain labeling. *NeuroImage* 2005;24(2):261-80.
- [23] Tadel F, Baillet S, Mosher JC, Pantazis D, Leahy RM. Brainstorm: a user-friendly application for MEG/EEG analysis. *Computational intelligence and neuroscience* 2011;2011.
- [24] Schieber MH. How might the motor cortex individuate movements? *Trends in neurosciences* 1990;13(11):440-5.
- [25] DeJong SL, Bisson JA, Darling WG, Shields RK. Simultaneous Recording of Motor Evoked Potentials in Hand, Wrist and Arm Muscles to Assess Corticospinal Divergence. *Brain Topography* 2021:1-15.

- [26] Gomez-Tames J, Hamasaka A, Hirata A, Laakso I, Lu M, Ueno S. Group-level analysis of induced electric field in deep brain regions by different TMS coils. *Physics in Medicine & Biology* 2020;65(2):025007.
- [27] Opitz A, Windhoff M, Heidemann RM, Turner R, Thielscher A. How the brain tissue shapes the electric field induced by transcranial magnetic stimulation. *Neuroimage* 2011;58(3):849-59.
- [28] De Lucia M, Parker GJ, Embleton K, Newton J, Walsh V. Diffusion tensor MRI-based estimation of the influence of brain tissue anisotropy on the effects of transcranial magnetic stimulation. *Neuroimage* 2007;36(4):1159-70.
- [29] Vink JJ, Mandija S, Petrov PI, van den Berg CA, Sommer IE, Neggers SF. A novel concurrent TMS-fMRI method to reveal propagation patterns of prefrontal magnetic brain stimulation. *Human brain mapping* 2018;39(11):4580-92.
- [30] Aberra AS, Wang B, Grill WM, Peterchev AV. Simulation of transcranial magnetic stimulation in head model with morphologically-realistic cortical neurons. *Brain stimulation* 2020;13(1):175-89.

## Appendix

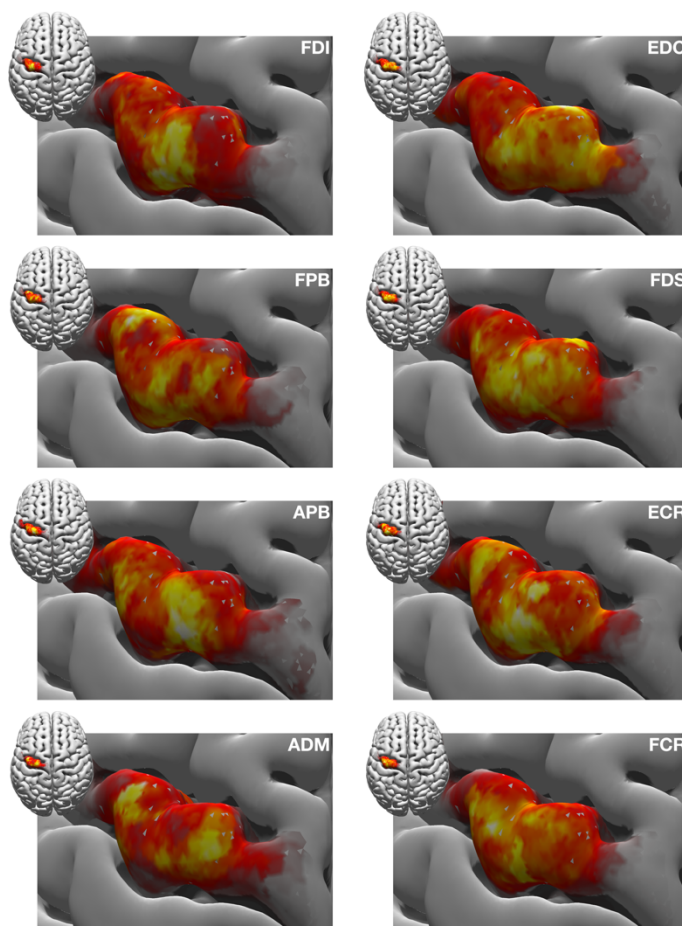

**Figure A1.** Group average of the cortical representations for the 105%-RMT-FDI intensity. This figure agrees with Fig. 5 except for the colour-coding. While in Figure 5 intensities (MEP amplitudes) are given on a common scale, here every muscle map is scaled separately to highlight that the cortical distributions are typically complex even when looking at isolated muscles. Note that the multimodality is not (solely) caused by averaging over the group – see also *Supplementary Material*. The units of the colour coding are arbitrary.
